# Supplementary material for: Antidepressants in Amniotic Fluid: Another Route of Fetal Exposure
Source: Atypon-hosted journal article supplement (doi:10.1176/appi.ajp.163.1.145), 2006-01-01
Supplement: ajp_163_1_145.pdf [file ajp_163_1_145.pdf]

**Table 1. Amniocentesis Data and Obstetrical Outcome for 27 Subjects With Confirmed Antidepressant Exposure**

| Medication   | Subject        | Dose (mg/day) | Amniocentesis Data                |                        |            |                        |            |                                                  |            |                              | Obstetrical Outcome Data          |             |           |                   |  |
|--------------|----------------|---------------|-----------------------------------|------------------------|------------|------------------------|------------|--------------------------------------------------|------------|------------------------------|-----------------------------------|-------------|-----------|-------------------|--|
|              |                |               | Estimated Gestational Age (weeks) | Maternal Serum (ng/ml) |            | Amniotic Fluid (ng/ml) |            | Amniotic Fluid as a Percentage of Maternal Serum |            | Duration of Exposure (weeks) | Estimated Gestational Age (weeks) | APGAR Score |           | Birth Weight (kg) |  |
|              |                |               |                                   | Parent                 | Metabolite | Parent                 | Metabolite | Parent                                           | Metabolite |                              |                                   | 1 minute    | 5 minutes |                   |  |
| Citalopram   | A              | 50            | 17.0                              | 262                    | —          | 94                     | —          | 35.9                                             | —          | 39.6                         | 39.6                              | 2           | 8         | 3.18              |  |
|              | B              |               |                                   |                        |            |                        |            |                                                  |            |                              |                                   |             |           |                   |  |
| Escitalopram |                | 5             | 15.4                              | 17                     | —          | 3                      | —          | 17.6                                             | —          | 37.9                         | 37.9                              | —           | —         | 3.52              |  |
| Fluoxetine   | C              | 20            | 14.1                              | 224                    | 257        | 13                     | <2         | 5.8                                              | 0.8        | 39.9                         | 39.9                              | 8           | 9         | 3.25              |  |
|              | D              | 20            | 38.6                              | 64                     | 144        | 11                     | 26         | 17.2                                             | 18.1       | 38.6                         | 38.6                              | 8           | 9         | 3.23              |  |
|              | E              | 30            | 16.4                              | 75                     | 125        | 8                      | 13         | 10.7                                             | 10.4       | 39.6                         | 39.6                              | 5           | 8         | 3.21              |  |
|              | F              | 30            | 16.9                              | 138                    | 99         | <2                     | <2         | 1.4                                              | 2.0        | 38.1                         | 38.1                              | 8           | 9         | 3.00              |  |
|              | G              | 30            | 17.1                              | 226                    | 116        | 21                     | <2         | 9.3                                              | 1.7        | 39.0                         | 39.0                              | 5           | 9         | 2.82              |  |
|              | H              | 40            | 16.1                              | 376                    | 284        | 48                     | 16         | 12.8                                             | 5.6        | 35.9                         | 35.9 <sup>a</sup>                 | 5           | 8         | 2.60              |  |
|              | I              |               |                                   |                        |            |                        |            |                                                  |            |                              |                                   |             |           |                   |  |
|              |                | 40            | 16.4                              | 365                    | 474        | 33                     | 34         | 9.0                                              | 7.2        | 36.0                         | 36.0 <sup>a</sup>                 | 7           | 9         | 3.51              |  |
|              | J <sup>b</sup> | 40            | 19.0                              | —                      | —          | 43                     | 52         | —                                                | —          | 38.1                         | 38.1                              | 8           | 9         | 2.90              |  |
|              | K              | 40            | 17.0                              | 67                     | 161        | 2                      | 33         | 3.0                                              | 20.5       | 40.0                         | 40.0                              | 8           | 9         | 3.32              |  |
|              | L              | 40            | 17.1                              | 124                    | 120        | 10                     | 25         | 8.1                                              | 20.8       | 38.4                         | 38.4                              | 6           | 9         | 2.70              |  |
|              | M              | 40            | 17.0                              | 189                    | 144        | 49                     | 31         | 25.9                                             | 21.5       | 38.6                         | 38.6                              | 8           | 9         | 3.27              |  |
|              | N              | 80            | 16.1                              | 437                    | 435        | 34                     | 18         | 7.8                                              | 4.1        | 38.3                         | 38.3                              | 7           | 9         | 3.01              |  |
|              | Mean           | 39            | 18.9                              | 207.7                  | 214.5      | 22.8                   | 21.2       | 10.1                                             | 10.3       | 38.4                         | 38.4                              | 6.9         | 8.8       | 3.10              |  |
|              | SD             | 16.6          | 7.0                               | 132.9                  | 132.4      | 17.7                   | 15.4       | 6.8                                              | 8.4        | 1.3                          | 1.3                               | 1.3         | 0.4       | 0.30              |  |
| Fluvoxamine  | O <sup>c</sup> | 100           | 15.7                              | 41                     |            | 4                      |            | 9.8                                              |            | 40.4                         | 40.4                              | 8           | 9         | 3.23              |  |
|              | P-IR           |               |                                   |                        |            |                        |            |                                                  |            |                              |                                   |             |           |                   |  |
| Paroxetine   |                | 20            | 16.7                              | 39                     |            | <2                     |            | 5.1                                              |            | 38.3                         | 38.3                              | 8           | 9         | 3.29              |  |
|              | Q-IR           | 40            | 16.1                              | 14                     |            | 3                      |            | 21.4                                             |            | 37.4                         | 37.4                              | 8           | 9         | 2.85              |  |
| Sertraline   | R              | 50            | 14.7                              | 52                     | 83         | <2                     | 16         | 3.9                                              | 19.3       | 39.0                         | 39.0                              | 8           | 9         | 3.86              |  |
|              | S              | 75            | 36.4                              | 50                     | 102        | <2                     | <2         | 4.0                                              | 2.0        | 36.6                         | 36.6 <sup>a</sup>                 | 8           | 9         | 2.54              |  |
|              | T              |               |                                   |                        |            |                        |            |                                                  |            |                              |                                   |             |           |                   |  |
|              |                | 125           | 16.6                              | 83                     | 177        | <2                     | <2         | 2.4                                              | 1.1        | 36.4                         | 36.4 <sup>a</sup>                 | 8           | 9         | 3.17              |  |
|              | U <sup>c</sup> | 150           | 16.3                              | 53                     | 349        | <2                     | 19         | 3.8                                              | 5.4        | 39.0                         | 39.0                              | 9           | 9         | 3.66              |  |
|              | V              | 150           | 18.9                              | 73                     | 149        | 25                     | 43         | 34.3                                             | 28.9       | 39.3                         | 39.3                              | 8           | 9         | 3.10              |  |
|              | W              | 250           | 21.7                              | 248                    | 405        | 16                     | 30         | 6.5                                              | 7.4        | 34.9                         | 34.9 <sup>a</sup>                 | 7           | 9         | 2.65              |  |

|             |                        |       |      |      |       |      |       |       |       |      |                   |     |     |                   |  |  |  |  |  |
|-------------|------------------------|-------|------|------|-------|------|-------|-------|-------|------|-------------------|-----|-----|-------------------|--|--|--|--|--|
|             |                        |       |      |      |       |      |       |       |       |      |                   |     |     |                   |  |  |  |  |  |
|             | Mean                   | 133.3 | 20.8 | 93.2 | 210.8 | 8.2  | 18.7  | 9.1   | 10.7  | 37.8 | 37.8              | 8.0 | 9.0 | 3.16              |  |  |  |  |  |
|             | SD                     | 70.1  | 8.0  | 77.0 | 134.1 | 9.9  | 16.0  | 12.4  | 11.0  | 1.9  | 1.9               | 0.7 | 0.0 | 0.59              |  |  |  |  |  |
|             | X-XR                   |       |      |      |       |      |       |       |       |      |                   |     |     |                   |  |  |  |  |  |
| Venlafaxine |                        | 150   | 16   | 54   | 287   | 46   | 100   | 85.2  | 34.8  | 35.9 | 35.9 <sup>a</sup> | 7   | 9   | 2.25 <sup>d</sup> |  |  |  |  |  |
|             | Y <sup>b,c,e</sup> -IR |       |      |      |       |      |       |       |       |      |                   |     |     |                   |  |  |  |  |  |
|             |                        | 200   | 20.6 | —    | —     | 16   | 313   | —     | —     | 25.4 | 36.0 <sup>a</sup> | 9   | 9   | 2.69              |  |  |  |  |  |
|             |                        |       |      |      |       |      |       |       |       |      |                   | 7   | 9   | 3.09              |  |  |  |  |  |
|             | Z-XR                   | 225   | 36.3 | 64   | 388   | 171  | 1621  | 267.2 | 417.8 | 36.4 | 36.4 <sup>a</sup> | 5   | 8   | 2.50              |  |  |  |  |  |
|             | AA-XR                  | 225   | 34.7 | 32   | 137   | 53   | 612   | 165.6 | 446.7 | 36.1 | 36.1 <sup>a</sup> | 9   | 9   | 2.90              |  |  |  |  |  |
|             | Mean                   | 200   | 26.9 | 50.0 | 270.7 | 71.5 | 661.5 | 172.7 | 299.8 | 33.5 | 36.1              | 7.4 | 8.8 | 2.69              |  |  |  |  |  |
|             | SD                     | 35.4  | 10.1 | 16.4 | 126.3 | 68.2 | 673.3 | 91.2  | 229.9 | 5.4  | 0.2               | 1.7 | 0.4 | 0.33              |  |  |  |  |  |

<sup>a</sup>Preterm delivery.

<sup>b</sup>Maternal serum collected more than 2 weeks from amniocentesis.

<sup>c</sup>Previously reported by Hostetter et al. (1).

<sup>d</sup>Low birthweight.

<sup>e</sup>Delivered twins. APGAR scores given for each twin.

## Reference

1. Hostetter A, Ritchie JC, Stowe ZN: Amniotic fluid and umbilical cord blood concentrations of antidepressants in three women. *Biol Psychiatry* 2000; 48:1032–1034
